# Supplementary material for: Crystal Structures of the Catalytic Domain of Arabidopsis thaliana Starch Synthase IV, of Granule Bound Starch Synthase From CLg1 and of Granule Bound Starch Synthase I of Cyanophora paradoxa Illustrate Substrate Recognition in Starch Synthases
Source: PubMed Central journal article supplement (PMC6086201; doi:10.3389/fpls.2018.01138), 2018-08-03
Supplement: Data_Sheet_1.pdf [file Data_Sheet_1.pdf]

## Supplementary Material

# Crystal Structures of the catalytic domain of *Arabidopsis thaliana* Starch Synthase IV, of Granule Bound Starch Synthase From CLg1 and of Granule Bound Starch Synthase I of *Cyanophora paradoxa* Illustrate Substrate Recognition in Starch Synthases

Morten M. Nielsen, Christian Ruzanski, Katarzyna Krucewicz, Alexander Striebeck, Ugo Cenci, Steven G. Ball, Monica M. Palcic, Jose A. Cuesta-Seijo\*

\* Correspondence: Jose A. Cuesta-Seijo: josea.cuesta.seijo@carlsberg.com

### 1 Supplementary Data

Protein sequences expressed:

CLg1GBSS:

```
MGSSHHHHHSSGLVPRGSHMLNICFVSTEVAPYSKTGGLGDVTEGLPEELAKIGHKVCT
VAPRFDQYEDAWDTEIIQPVNYGQEKTNVRYFHSYKKGVDHIWVDHHVYLSKTPLVNKKL
YGPKDSVDYIDNVERFAMLSQAALAVPLLVPLGAKGSQGVMGENTIFVCNDWHTSLLPLY
LKEYYQSQGI FVNAKTVMLLHNI AFQGRFPSSKFDALNLPKAYLSDLSFNTQFAPPPLDE
KTTEPITSPEPMYMLNWLKAGFLNCDQALTVSPNFAHEVTSSPMGGVELDAVARDVGLTG
ITNGTKIETWNPQKDKFILANYNSRTINSGKKLCKVALQKECGLTVDPDIPLFGFIGRLE
NQKGADVIAAMPKLLKQLNCQVVI LGIGSPKLEQELESVADKYPFAKGVARFDSKLAHFI
TAGADYCLMPSRFEP CGLNQLYAMMYGTIPVVAPVGGGLVDTVPPQFGFLMNKIPMPKIPG
VTVSEELLQQGV DAMIVGMKKALQEYGT PKFKKMLDCMANDVSWKKPAAKYVDIFEQLV
NSQV
```

Catalytic domain of AtSSIV for crystallization:

```
LVSSPTSSGLYVVHIAAEMAPVAKVGGGLGDVVAGLGKALQRKGHLVEIILPKYDCMQYDRVRDLRAL
DTVVESYFDGKLYKNKIWIGTVEGLPVHFI EPQHPSKFFWRGQFYGEQDDFRRFYSFRAALELLQ
SGKKPDI IHCHDWQTAFVAPLYWDLYAPKGLDSARICFTCHNFEYQGTASASELGSCGLDVNQLNRP
DRMQDHSSGDRVNPVKGAII FSNIVTTVSPTYAQEVRTAEGGKGLHSTLNFHSSKFFIGILNGIDTDS
WNPATDPFLKAQFNKDLQKKEENKHALRKQLGLSSAESRRPLVGCITRLVPQKGVHLIRHAIYRTL
ELGGQFVLLGSSPVPHIQREFEGIEQQFKSHDHVRLLLKYDEALSHTIYAASDLFIIPSI FEP CGLT
QMIAMRYGSIPIARKTGGLNDSVFDIDDDTIPTQFQNGFTFQTADEQGFNYALERAFNHYKKDEEKW
MRLVEKVM S IDFSWGSSATQYEELYTRSVSRARAVPNRT
```

A C-terminal IDPFTENLYFQGHHHHHH sequence was included in the expressed construct and cleaved with TEV protease during purification.

Full length AtSSIV for activity assays:

MCKMRQQRGFDSKRQEVKKGSPKPILSINSGLQSNNDDEESDLENGSADSVPSLKSDAEKGSIIHGS  
 IDMNHADENLEKKDDIQTTEVTRRKSKTAKKKGESIHATIDIGHDDGKNLDNITVPEVAKALSLNKS  
 EGEQISDGQFGELMTMIRSAEKNILRLDEARATALDDLNKILSDKEALQGEINVLEMKLSETDERIK  
 TAAQEKAHVLEELLEEQLKLRHEMISPIESDGYVLALSKELETLKLENLSLRNDIEMLKSELDSVKDT  
 GERVVVLEKECSGLESSVKDLESKLSVVSQEDVSQLSTLKIECTDLWAKVETLQLLLDRATKQAEQAV  
 IVLQQNQDLRNKVDKIEESLKEANVYKESSEKIQQYNELMQHKVTLLEERLEKSDAEIFSIVVQLYQE  
 SIKEFQETLESLSKEESKKSRRDEPVDDMPWDYWSRLLLLTVDGWLEKKIASNDADLLRDMVWKKDRR  
 IHDTYIDVKDKNERDAISAFKLKLVSSPTSSGLYVVHIAAEMAPVAKVGGGLGDVVAGLGKALQRKGH  
 VEIILPKYDCMQYDRVRDLRALDTVVESYFDGKLYKNKIWIIGTVEGLPVHFIEPQHPSKFFWRGQFY  
 GEQDDFRRFYSYFSRAALELLLQSGKPKDIIHCHDWQTAFVAPLYWDLYAPKGLDSARICFTCHNFEY  
 QGTASASELGSCGLDVNQLNRPDRMQDHSSGDRVNPVKGAIIFSNIIVTTVSPTYAQEVRTAEGGKGL  
 HSTLNFHSSKFFIGILNGIDTDSWNPATDPFLKAQFNADLQKKEENKHALRKQLGLSSAESRRPLVG  
 CITRLVPQKGVHLIRHAIYRTLELGGQFVLLGSSPVPHIQREFEGIEQQFKSHDHVRLLLKYDEALS  
 HTIYAASDLFIIPSIPEPCGLTQMIAMRYGSIPIARKTGGLNDSVFDIDDDTIPTQFQNGFTFQTAD  
 EQGFNYALERAFNHYKKDEEKWMRLVEKVMSIDFSWGSSATQYEELYTRSVSRARAVPNRT

A C-terminal IDPFTENLYFQGHHHHHH sequence was included in the expressed construct and cleaved with TEV protease during purification.

CpGBSSI :

MGSSHHHHHSSGLVPRGSHMNIAPVSELQAAIDQAEKKLTIIVFVGSECTPWSKTGGLGDVMRDLPV  
 NLAQRGHRVMSIQPRYDQYFDAWDTAVRSSIKVNGKLEDVGGFFHITSKGVDRIFIDHPWFLAKVWGI  
 TGNKLYGAKTGVDYPDNPMRFALMCQAALAPLRIPLPDPAGTVYGEDVIFVCNDWHSALVPIYLKA  
 NYKTRGLYQNAKSIFLLHNIYQGRFPLEFWPALNLPEAAKLDLVFESCFAPPPLDGISEQPIISLK  
 PMAMNLFLOAGFIHADRICTVSPQFAAEVASGPRGGVELDKYIRAKGITGIMNGMDIEMWDASKDKF  
 LVTKYTASSVDEGKAANKAVLQAEMGLKVSPTTPLIAFVGRLLDDQKQKADCMVEAMPYLVNLTGAQVV  
 CYGSGREDMAAKFKALEKQFPGMAKGTAFVPKEEHTLMAGADYVLMPSRFEPGLVQLHAMKYGAV  
 PIVSCTGGLKDSVIPECGFTFEEIPEPEYPMKISPELIAKGTKIEEGCKEALAGYGSKAFAGMRA  
 ACMKQDFAWKKRVLVYEKVFYETLGI DRGAPVTAKASPVAPPEPSAAPAPATISAATSGGILPVPKAA  
 APKAPKVGGA

## 2 Supplementary Figures and Tables

For more information on Supplementary Material and for details on the different file types accepted, please see [here](#).

### 2.1 Supplementary Figures

#### Supplementary Figure 1.

Further details in the structure of AtSSIV. The protein is shown as sticks with green carbons; ligands are shown as ball and stick with gray carbons. A) Details around His190. Yellow dashed lines highlight its proximity to the anomeric carbon of a hypothetical glucose and its orientation relative to the distal phosphate of ADP. B) Conformation of the surface binding site formed by Trp172 and Phe237, with the modelled maltose shown.

#### Supplementary Figure 2.

Phylogenetic tree of GBSS and SSI and SSII rooted with an outgroup (A) or focusing on algae synthase with midpoint rooting (B). The trees were obtained with IQ-TREE (Nguyen et al., 2015)

and maximum likelihood bootstrap values from 100 repetitions are indicated onto the nodes, only nodes > 50% are shown. Groups are color-coded according to taxonomy: Viridiplantae are in green, Glaucophyta are in light blue, Rhodophyta are in red, Alveolata in dark brown, Cryptophyta are in light brown, Cyanobacteria are in dark blue, and other bacteria are in black. The scale bar shows the inferred number of amino acid substitutions per site. The tree in A is manually rooted while tree in B is midpoint rooted. Because GT5 ADP-Glc using glycogen synthases are not found in eukaryotes with the exception of Archaeplastida, it is reasonable to hypothesize a prokaryotic source for this enzyme, as discussed in the text, leaving only two candidate bacterial taxa for the tree's true root. These are highlighted by grey arrows in panels A and B.

### **Supplementary Table 1.**

Specific activities measured for the enzymes in this study. Activities were measured chromogenically as described in (Cuesta-Seijo et al., 2016) and are given in  $\mu\text{mol}$  of product per minute and per mg of protein. Glc1 to Glc8 represent the series of maltodextrins from glucose to maltooctaose. For AtSSIV, there are two columns of data: “AtSSIV” for the full length protein, and “AtSSIV\_CD” for the catalytic domain construct used for crystallization. CLg1GBSS was non-saturable with either glycogen or Glc4, hence no  $K_{\text{cat}}$  values are given. The concentrations of both donor (ADP-glucose or UDP-glucose) and acceptor used in each assay are given in the first column.
