# Supplementary material for: Crystal Structures of the Catalytic Domain of Arabidopsis thaliana Starch Synthase IV, of Granule Bound Starch Synthase From CLg1 and of Granule Bound Starch Synthase I of Cyanophora paradoxa Illustrate Substrate Recognition in Starch Synthases
Source: PubMed Central journal article supplement (PMC6086201; doi:10.3389/fpls.2018.01138), 2018-08-03

**A**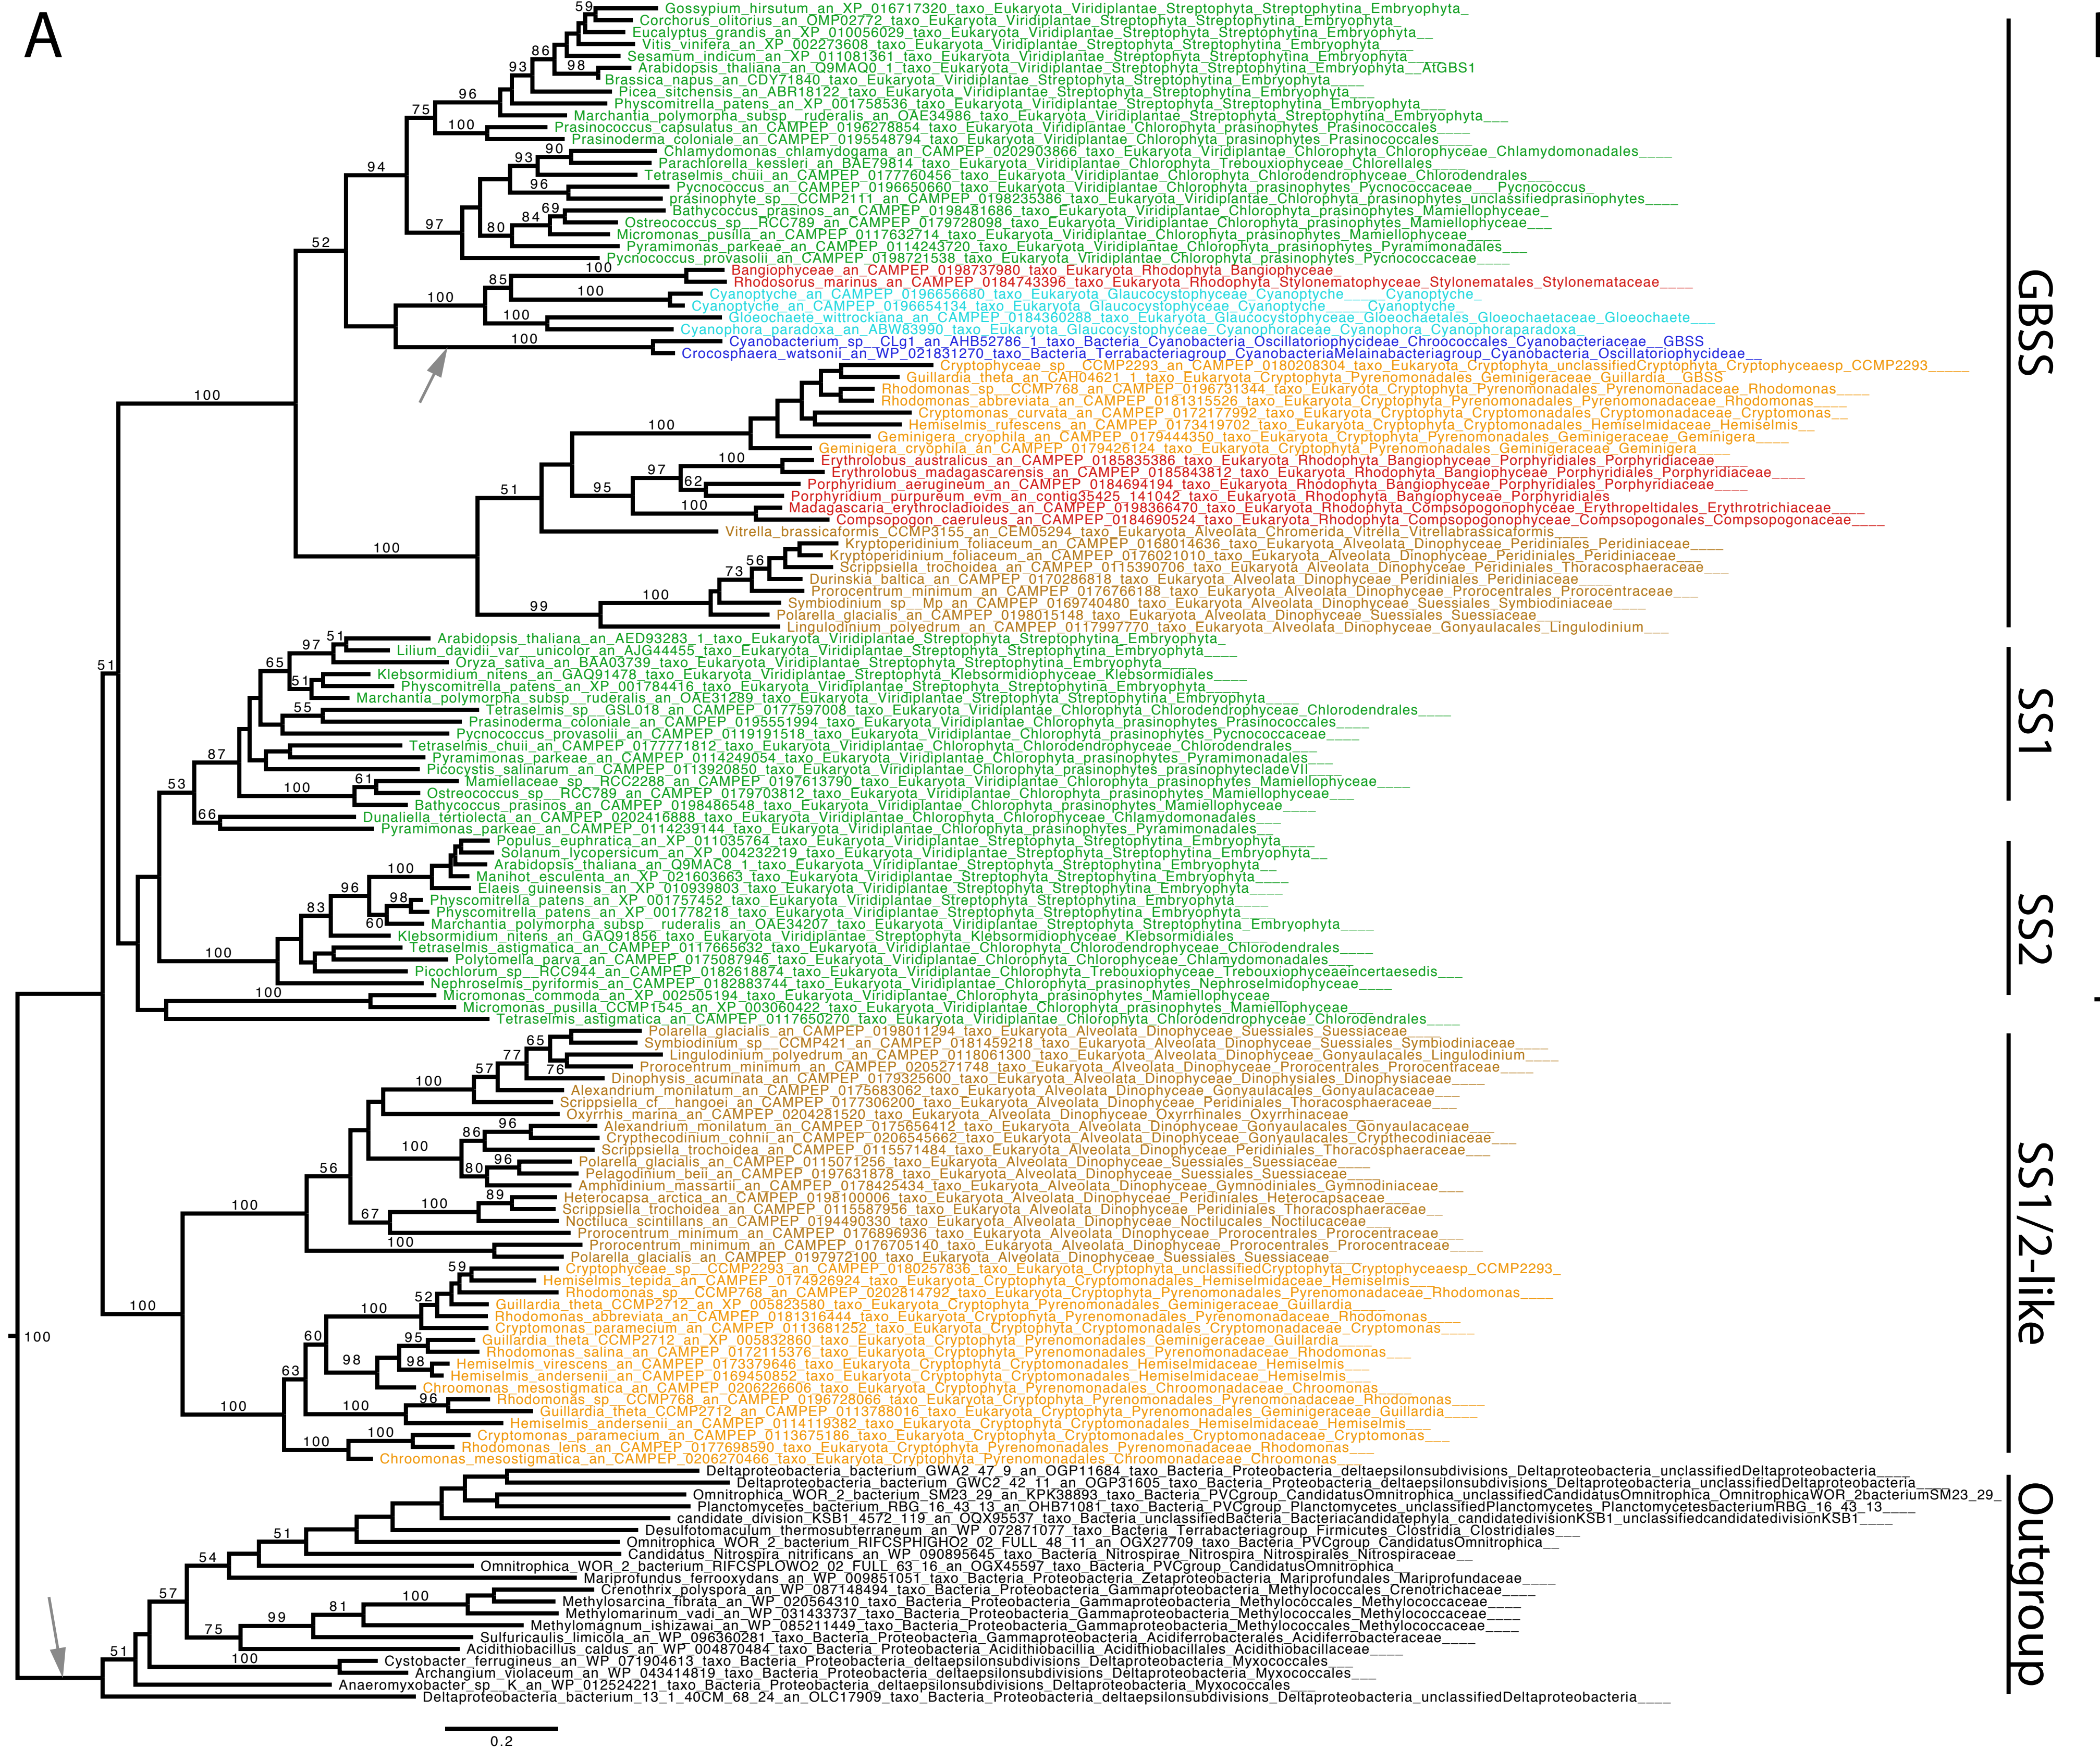**B**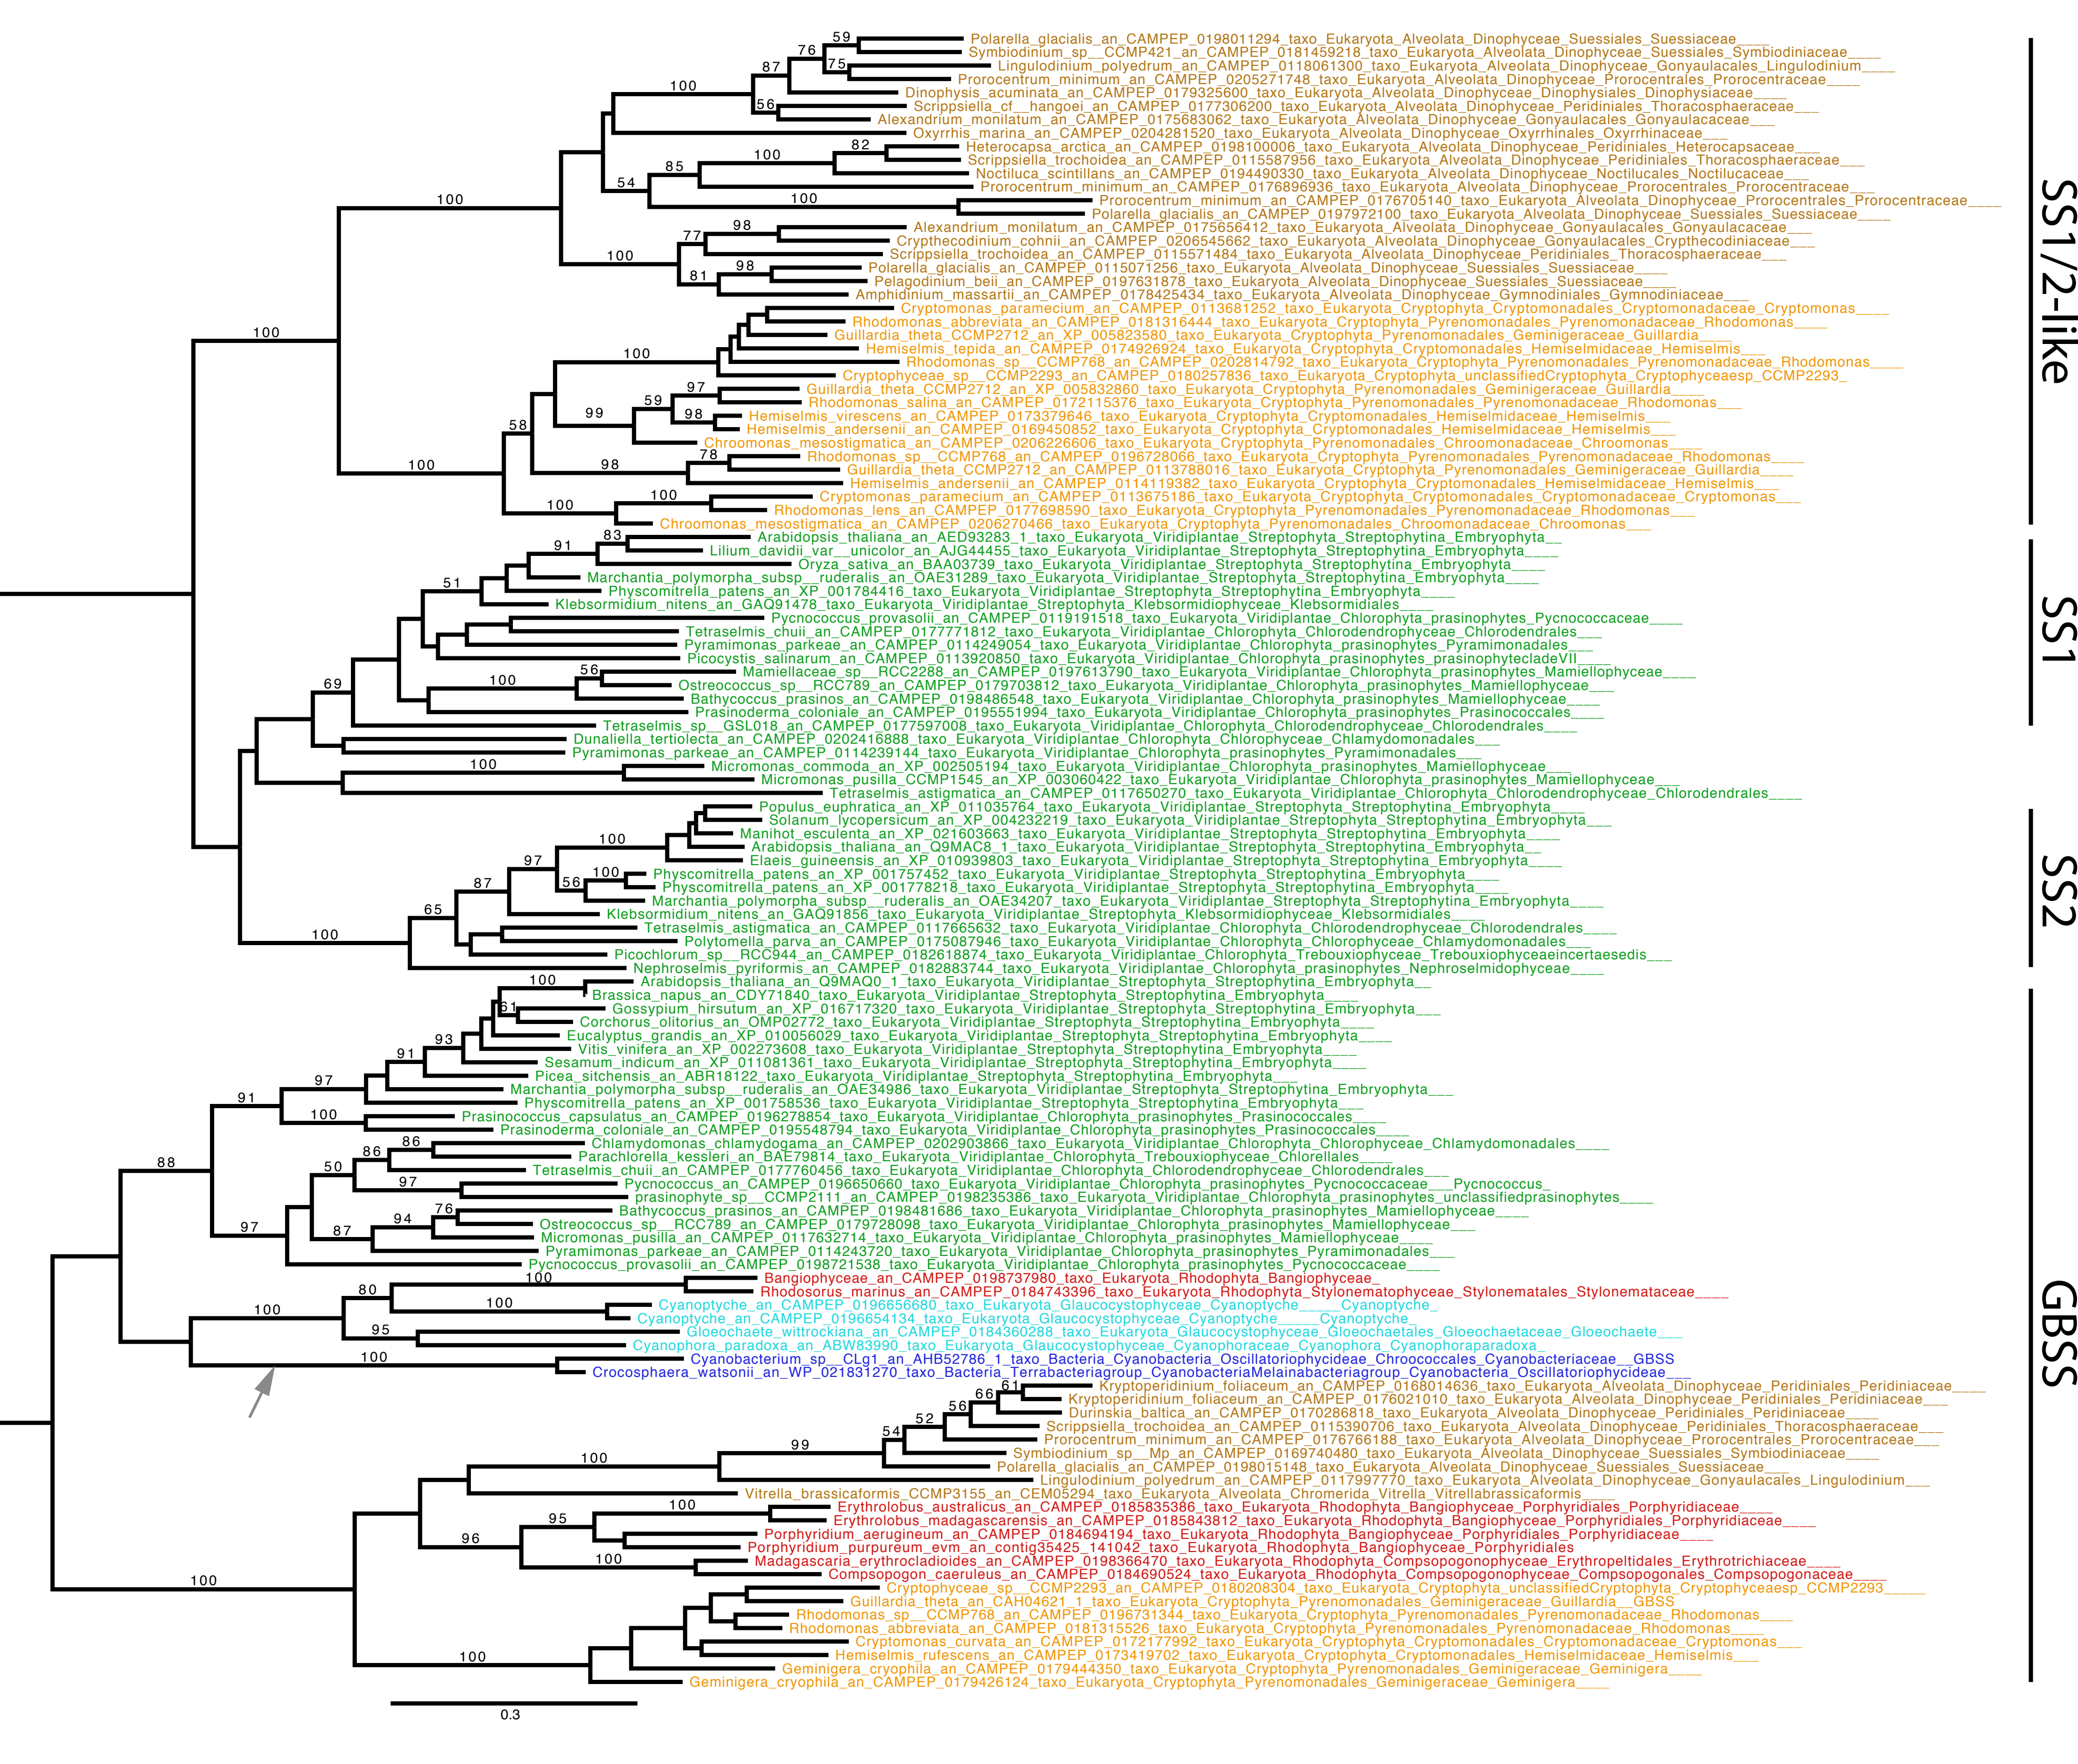**C**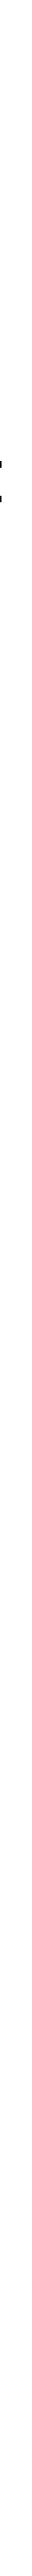

Supplement: Image_2.pdf [file Image_2.pdf]
